# Supplementary material
Source: PubMed Central journal article supplement (PMC4978304)
Supplement: pnas.1601915113.sapp.pdf [file pnas.1601915113.sapp.pdf]

# Supporting Information

## Charge Transport Network Dynamics in Molecular Aggregates

Nicholas E. Jackson<sup>1</sup>, Lin X. Chen<sup>1,2</sup>, Mark A. Ratner<sup>1</sup>

<sup>1</sup>Department of Chemistry, Northwestern University, 2145  
Sheridan Rd., Evanston, Illinois 60208, United States.

<sup>2</sup> Chemical Sciences and Engineering Division, Argonne National Laboratory,  
Lemont, Illinois 60439, United States

### Table of Contents:

1. Simulation Box Protocols
2. OPLS Force-Field Parameters
3. Relevant Input Files for LAMMPS
4. Figure 3 Fits
5. Transfer Integral TCF & Fourier Transform
6. TCF of Matrix Spectral Norm
7. Correlations between Kirchoff Index and Zero-Field Mobilities Using a Kinetic Monte Carlo Model

### Simulation Box Protocol

Since this manuscript is primarily concerned with network methodological development for analyzing amorphous systems, our simulation procedure is not overly concerned with identifying the lowest energy non-crystalline morphology possible. If this were the case, a longer (~microseconds) and more gradual morphology simulation would be required. However, for the purposes of our short-time electronic dynamics (~20 ps), the following procedure is sufficient for generating a morphology required for electronic structure analysis.

### **Disordered PDI**

1. A cubic box of length 100 Angstroms was randomly packed with 64 PDI molecules possessing random locations and orientations.
2. A force minimization is done in combination with a box compression to increase the density of the initially diffusely packed box, while simultaneously removing any bad contacts. This is followed by a brief (<20 ps) NVE run to reinitialize the packing of the box.
3. Another force minimization with box compression is performed to further compress the box to within a factor of 2 of the expected density. This is once again followed by a brief 20 ps NVE re-initialization of the box geometry.

4. A 100 ps NPT heating run is performed at 1 atm from 10K to 550K, the annealing temperature. The velocity distribution is randomly initialized according to the Boltzmann distribution.
5. A 10 ns NPT annealing run at 550K
6. A 10 ns NPT cooling run from 550K to 298 K.
7. A 10 ns NPT equilibration run at 298K.
8. A 1 ns NVT equilibration run at the average box volume of the previous 10 ns run.
9. A 100 ps NVE equilibration.
10. A 20 ps NVE sampling run, where the data in the manuscript is taken at 10 fs intervals.

### **Disordered bBDT(TDPP)<sub>2</sub>**

11. A cubic box of length 100 Angstroms was randomly packed with 100 BTI molecules possessing random locations and orientations.
12. A force minimization is done in combination with a box compression to increase the density of the initially diffusely packed box, while simultaneously removing any bad contacts. This is followed by a brief (<20 ps) NVE run to reinitialize the packing of the box.
13. Another force minimization with box compression is performed to further compress the box to within a factor of 2 of the expected density. This is once again followed by a brief 20 ps NVE re-initialization of the box geometry.
14. A 100 ps NPT heating run is performed at 1 atm from 10K to 550K, the annealing temperature. The velocity distribution is randomly initialized according to the Boltzmann distribution.
15. A 10 ns NPT annealing run at 550K
16. A 10 ns NPT cooling run from 550K to 298 K.
17. A 10 ns NPT equilibration run at 298K.
18. A 1 ns NVT equilibration run at the average box volume of the previous 10 ns run.
19. A 100 ps NVE equilibration.
20. A 20 ps NVE sampling run, where the data in the manuscript is taken at 10 fs intervals.

### **Crystalline bBDT(TDPP)<sub>2</sub>**

21. The unit cell of bBDT(TDPP)<sub>2w</sub> was repeated in a 5x5x2 block composed of 100 molecules, and a simulation cell corresponding to the appropriate unit cell was constructed.
22. A force minimization is done to remove bad contacts. This is followed by a brief (<20 ps) NVE run to reinitialize the packing of the box.
23. A 100 ps NPT heating run is performed at 1 atm from 10K to 550K, the annealing temperature. The velocity distribution is randomly initialized according to the Boltzmann distribution.

24. A 10 ns NPT annealing run at 550K
25. A 10 ns NPT cooling run from 550K to 298 K.
26. A 10 ns NPT equilibration run at 298K.
27. A 1 ns NVT equilibration run at the average box volume of the previous 10 ns run.
28. A 100 ps NVE equilibration.
29. A 20 ps NVE sampling run, where the data in the manuscript is taken at 10 fs intervals.

### OPLS Force-Field Parameters

Since standard OPLS force-field parameters do not accurately describe the atomic geometry, atomic partial charges, and dihedral angles of PDI and bBDT(TDPP)<sub>2</sub>, many of these values were parameterized by hand using quantum-chemical calculations. All bond distances and angle values were taken from the B3LYP/6-31G\*\* geometry optimized structures. Atomic partial charges were determined by performing B3LYP/6-31G\*\* CHelpG calculations on the geometry optimized structure. Improper dihedral angles were selected to rigidify the pi-system. The specific OPLS2009 parameters provided below are taken from the TINKER .prm files, as they are presented in an easily digestible format.

#### PDI

```

atom    907  110 N "PDI N1 class 35" 7 14.007 3
atom    908   111 C "PDI C2 class 3" 6 12.011 3
atom    909   112 C "PDI C3 class 38" 6 12.011 3
atom    910   113 C "PDI C4 class 38" 6 12.011 3
atom    911   114 C "PDI C5 class 38" 6 12.011   3
atom    912   115 C "PDI C6 class 38" 6 12.011   3
atom    913   116 C "PDI C7 class 38" 6 12.011 3
atom    914   117 C "PDI C8 class 38" 6 12.011 3
atom    915   118 O "PDI O9 class 4" 8 15.999 1
atom    916    13 C "PDI C10 class 13" 6 12.011 4
atom    917    39 H "PDI H11 class 39" 1 1.008 1
atom    918    39 H "PDI H12 class 39" 1 1.008 1
bond    110   111 490.00 1.409
bond    110    13 337.00 1.497
bond    111   112 400.00 1.484
bond    112   113 469.00 1.385
bond    113   114 469.00 1.399
bond    114   115 469.00 1.396
bond    115   116 469.00 1.431
bond    116   117 469.00 1.429
bond    111   118 570.00 1.225
bond    115   115 469.00 1.470
bond    112   117 469.00 1.414
bond    113    39 367.00 1.083
bond    114    39 367.00 1.083
angle   111   110   111 70.00 123.8
angle   111   110    13 50.00 117.0
angle   110   111   112 70.00 117.3
angle   110   111   118 80.00 121.4
angle   112   111   118 80.00 121.3
angle   111   112   113 85.00 119.3
angle   111   112   117 85.00 121.1
angle   113   112   117 63.00 119.6

```

|                     |     |        |        |       |       |     |   |        |       |   |       |     |   |
|---------------------|-----|--------|--------|-------|-------|-----|---|--------|-------|---|-------|-----|---|
| angle               | 112 | 113    | 114    | 63.00 | 120.4 |     |   |        |       |   |       |     |   |
| angle               | 112 | 113    | 39     | 35.00 | 118.7 |     |   |        |       |   |       |     |   |
| angle               | 114 | 113    | 39     | 35.00 | 120.9 |     |   |        |       |   |       |     |   |
| angle               | 113 | 114    | 115    | 63.00 | 121.9 |     |   |        |       |   |       |     |   |
| angle               | 113 | 114    | 39     | 35.00 | 117.8 |     |   |        |       |   |       |     |   |
| angle               | 115 | 114    | 39     | 35.00 | 120.2 |     |   |        |       |   |       |     |   |
| angle               | 114 | 115    | 115    | 63.00 | 122.4 |     |   |        |       |   |       |     |   |
| angle               | 114 | 115    | 116    | 63.00 | 118.5 |     |   |        |       |   |       |     |   |
| angle               | 115 | 115    | 116    | 63.00 | 119.1 |     |   |        |       |   |       |     |   |
| angle               | 115 | 116    | 115    | 63.00 | 121.8 |     |   |        |       |   |       |     |   |
| angle               | 115 | 116    | 117    | 63.00 | 119.1 |     |   |        |       |   |       |     |   |
| angle               | 112 | 117    | 112    | 63.00 | 119.3 |     |   |        |       |   |       |     |   |
| angle               | 112 | 117    | 116    | 63.00 | 120.4 |     |   |        |       |   |       |     |   |
| angle               | 110 | 13     | 13     | 80.00 | 111.7 |     |   |        |       |   |       |     |   |
| angle               | 110 | 13     | 36     | 35.00 | 103.1 |     |   |        |       |   |       |     |   |
| torsion             | 111 | 110    | 111    | 112   | 0.000 | 0.0 | 1 | 7.250  | 180.0 | 2 | 0.000 | 0.0 | 3 |
| torsion             | 111 | 110    | 111    | 118   | 0.000 | 0.0 | 1 | 2.100  | 180.0 | 2 | 0.000 | 0.0 | 3 |
| torsion             | 13  | 110    | 111    | 112   | 0.000 | 0.0 | 1 | 7.250  | 180.0 | 2 | 0.000 | 0.0 | 3 |
| torsion             | 13  | 110    | 111    | 118   | 0.000 | 0.0 | 1 | 2.100  | 180.0 | 2 | 0.000 | 0.0 | 3 |
| #side-chain torsion |     |        |        |       |       |     |   |        |       |   |       |     |   |
| torsion             | 111 | 110    | 13     | 13    | 0.000 | 0.0 | 1 | 0.000  | 180.0 | 2 | 0.000 | 0.0 | 3 |
| torsion             | 111 | 110    | 13     | 36    | 0.000 | 0.0 | 1 | 0.000  | 180.0 | 2 | 0.000 | 0.0 | 3 |
| torsion             | 110 | 111    | 112    | 113   | 0.000 | 0.0 | 1 | 7.250  | 180.0 | 2 | 0.000 | 0.0 | 3 |
| torsion             | 110 | 111    | 112    | 117   | 0.000 | 0.0 | 1 | 7.250  | 180.0 | 2 | 0.000 | 0.0 | 3 |
| torsion             | 118 | 111    | 112    | 113   | 0.000 | 0.0 | 1 | 2.100  | 180.0 | 2 | 0.000 | 0.0 | 3 |
| torsion             | 118 | 111    | 112    | 117   | 0.000 | 0.0 | 1 | 2.100  | 180.0 | 2 | 0.000 | 0.0 | 3 |
| torsion             | 111 | 112    | 113    | 114   | 0.000 | 0.0 | 1 | 7.250  | 180.0 | 2 | 0.000 | 0.0 | 3 |
| torsion             | 111 | 112    | 113    | 39    | 0.000 | 0.0 | 1 | 7.250  | 180.0 | 2 | 0.000 | 0.0 | 3 |
| torsion             | 117 | 112    | 113    | 39    | 0.000 | 0.0 | 1 | 7.250  | 180.0 | 2 | 0.000 | 0.0 | 3 |
| torsion             | 111 | 112    | 117    | 112   | 0.000 | 0.0 | 1 | 7.250  | 180.0 | 2 | 0.000 | 0.0 | 3 |
| torsion             | 111 | 112    | 117    | 116   | 0.000 | 0.0 | 1 | 7.250  | 180.0 | 2 | 0.000 | 0.0 | 3 |
| torsion             | 117 | 112    | 113    | 114   | 0.000 | 0.0 | 1 | 7.250  | 180.0 | 2 | 0.000 | 0.0 | 3 |
| torsion             | 113 | 112    | 117    | 112   | 0.000 | 0.0 | 1 | 7.250  | 180.0 | 2 | 0.000 | 0.0 | 3 |
| torsion             | 113 | 112    | 117    | 116   | 0.000 | 0.0 | 1 | 7.250  | 180.0 | 2 | 0.000 | 0.0 | 3 |
| torsion             | 112 | 113    | 114    | 115   | 0.000 | 0.0 | 1 | 7.250  | 180.0 | 2 | 0.000 | 0.0 | 3 |
| torsion             | 112 | 113    | 114    | 39    | 0.000 | 0.0 | 1 | 7.250  | 180.0 | 2 | 0.000 | 0.0 | 3 |
| torsion             | 39  | 113    | 114    | 115   | 0.000 | 0.0 | 1 | 7.250  | 180.0 | 2 | 0.000 | 0.0 | 3 |
| torsion             | 39  | 113    | 113    | 39    | 0.000 | 0.0 | 1 | 7.250  | 180.0 | 2 | 0.000 | 0.0 | 3 |
| torsion             | 39  | 113    | 114    | 39    | 0.000 | 0.0 | 1 | 7.250  | 180.0 | 2 | 0.000 | 0.0 | 3 |
| torsion             | 113 | 114    | 115    | 115   | 0.000 | 0.0 | 1 | 7.250  | 180.0 | 2 | 0.000 | 0.0 | 3 |
| torsion             | 113 | 114    | 115    | 116   | 0.000 | 0.0 | 1 | 7.250  | 180.0 | 2 | 0.000 | 0.0 | 3 |
| torsion             | 39  | 114    | 115    | 115   | 0.000 | 0.0 | 1 | 7.250  | 180.0 | 2 | 0.000 | 0.0 | 3 |
| torsion             | 39  | 114    | 115    | 116   | 0.000 | 0.0 | 1 | 7.250  | 180.0 | 2 | 0.000 | 0.0 | 3 |
| torsion             | 114 | 115    | 115    | 114   | 0.000 | 0.0 | 1 | 7.250  | 180.0 | 2 | 0.000 | 0.0 | 3 |
| torsion             | 114 | 115    | 115    | 116   | 0.000 | 0.0 | 1 | 7.250  | 180.0 | 2 | 0.000 | 0.0 | 3 |
| torsion             | 114 | 115    | 116    | 117   | 0.000 | 0.0 | 1 | 7.250  | 180.0 | 2 | 0.000 | 0.0 | 3 |
| torsion             | 116 | 115    | 115    | 116   | 0.000 | 0.0 | 1 | 7.250  | 180.0 | 2 | 0.000 | 0.0 | 3 |
| torsion             | 114 | 115    | 116    | 115   | 0.000 | 0.0 | 1 | 7.250  | 180.0 | 2 | 0.000 | 0.0 | 3 |
| torsion             | 115 | 115    | 116    | 115   | 0.000 | 0.0 | 1 | 7.250  | 180.0 | 2 | 0.000 | 0.0 | 3 |
| torsion             | 115 | 115    | 116    | 117   | 0.000 | 0.0 | 1 | 7.250  | 180.0 | 2 | 0.000 | 0.0 | 3 |
| torsion             | 115 | 116    | 117    | 112   | 0.000 | 0.0 | 1 | 7.250  | 180.0 | 2 | 0.000 | 0.0 | 3 |
| torsion             | 110 | 13     | 13     | 13    | 0.845 | 0.0 | 1 | -0.962 | 180.0 | 2 | 0.713 | 0.0 | 3 |
| torsion             | 110 | 13     | 13     | 36    | 0.000 | 0.0 | 1 | 0.000  | 180.0 | 2 | 0.464 | 0.0 | 3 |
| charge              | 907 | -0.148 |        |       |       |     |   |        |       |   |       |     |   |
| charge              | 908 | 0.534  |        |       |       |     |   |        |       |   |       |     |   |
| charge              | 909 | -0.270 |        |       |       |     |   |        |       |   |       |     |   |
| charge              | 910 | 0.010  |        |       |       |     |   |        |       |   |       |     |   |
| charge              | 911 | -0.220 |        |       |       |     |   |        |       |   |       |     |   |
| charge              | 912 | 0.060  |        |       |       |     |   |        |       |   |       |     |   |
| charge              | 913 | 0.050  |        |       |       |     |   |        |       |   |       |     |   |
| charge              | 914 | 0.210  |        |       |       |     |   |        |       |   |       |     |   |
| charge              | 915 | -0.480 |        |       |       |     |   |        |       |   |       |     |   |
| charge              | 916 | 0.040  |        |       |       |     |   |        |       |   |       |     |   |
| charge              | 917 | 0.120  |        |       |       |     |   |        |       |   |       |     |   |
| charge              | 918 | 0.140  |        |       |       |     |   |        |       |   |       |     |   |
| vdw                 | 907 | 3.2500 | 0.1700 |       |       |     |   |        |       |   |       |     |   |
| vdw                 | 908 | 3.7500 | 0.1050 |       |       |     |   |        |       |   |       |     |   |
| vdw                 | 909 | 3.5500 | 0.0700 |       |       |     |   |        |       |   |       |     |   |
| vdw                 | 910 | 3.5500 | 0.0700 |       |       |     |   |        |       |   |       |     |   |

|         |                 |        |        |       |         |         |       |       |       |
|---------|-----------------|--------|--------|-------|---------|---------|-------|-------|-------|
| vdw     | 911             | 3.5500 | 0.0700 |       |         |         |       |       |       |
| vdw     | 912             | 3.5500 | 0.0700 |       |         |         |       |       |       |
| vdw     | 913             | 3.5500 | 0.0700 |       |         |         |       |       |       |
| vdw     | 914             | 3.5500 | 0.0700 |       |         |         |       |       |       |
| vdw     | 915             | 2.9600 | 0.2100 |       |         |         |       |       |       |
| vdw     | 916             | 3.5000 | 0.0660 |       |         |         |       |       |       |
| vdw     | 917             | 2.4200 | 0.0300 |       |         |         |       |       |       |
| vdw     | 918             | 2.4200 | 0.0300 |       |         |         |       |       |       |
| torsion | 3 35 3 38       | 0.000  | 0.0 1  | 7.250 | 180.0 2 |         | 0.000 | 0.0 3 |       |
| torsion | 3 35 3 4        |        | 0.000  | 0.0 1 | 7.250   | 180.0 2 |       | 0.000 | 0.0 3 |
| torsion | 13 35 3 38      |        | 0.000  | 0.0 1 | 0.000   | 180.0 2 |       | 0.000 | 0.0 3 |
| imptors | 111 112 113 114 | 0.000  |        | 0.0 1 | 0.001   | 180.0 2 |       | 0.000 | 0.0 3 |
| imptors | 0 0 111 118     | 0.000  | 0.0 1  | 7.250 | 180.0 2 |         | 0.000 | 0.0 3 |       |

## bBDT(TDPP)<sub>2</sub>

|        |     |        |                        |    |        |   |  |  |  |
|--------|-----|--------|------------------------|----|--------|---|--|--|--|
| atom   | 907 | 101 S  | "Thiophene1 S"         | 16 | 32.060 | 2 |  |  |  |
| atom   | 908 | 102 Cd | "Thiophene1 C2"        | 6  | 12.011 | 3 |  |  |  |
| atom   | 909 | 103 CS | "Thiophene1 C3"        | 6  | 12.011 | 3 |  |  |  |
| atom   | 910 | 104 CS | "Thiophene1 C4"        | 6  | 12.011 | 3 |  |  |  |
| atom   | 911 | 105 Cd | "Thiophene1 C5"        | 6  | 12.011 | 3 |  |  |  |
| atom   | 912 | 106 HA | "Thiophene1 H1"        | 1  | 1.008  | 1 |  |  |  |
| charge | 907 |        | 0.03                   |    |        |   |  |  |  |
| charge | 908 |        | -0.18                  |    |        |   |  |  |  |
| charge | 909 |        | -0.17                  |    |        |   |  |  |  |
| charge | 910 |        | -0.12                  |    |        |   |  |  |  |
| charge | 911 |        | 0.03                   |    |        |   |  |  |  |
| charge | 912 |        | 0.16                   |    |        |   |  |  |  |
| vdw    | 907 | 3.5500 | 0.2500                 |    |        |   |  |  |  |
| vdw    | 908 | 3.5500 | 0.0700                 |    |        |   |  |  |  |
| vdw    | 909 | 3.5500 | 0.0700                 |    |        |   |  |  |  |
| vdw    | 910 | 3.5500 | 0.0700                 |    |        |   |  |  |  |
| vdw    | 911 | 3.5500 | 0.0700                 |    |        |   |  |  |  |
| vdw    | 912 | 2.4200 | 0.0300                 |    |        |   |  |  |  |
| atom   | 913 | 107 NA | "diKetoPyrrole N"      | 7  | 14.007 | 3 |  |  |  |
| atom   | 914 | 108 CW | "diKetoPyrrole C2O"    | 6  | 12.011 | 3 |  |  |  |
| atom   | 915 | 109 CW | "diKetoPyrrole C3"     | 6  | 12.011 | 3 |  |  |  |
| atom   | 916 | 110 CN | "diKetoPyrrole C4"     | 6  | 12.011 | 3 |  |  |  |
| atom   | 917 | 111 O  | "diKetoPyrrole C=O"    | 8  | 15.999 | 1 |  |  |  |
| atom   | 918 | 13 CT  | "diKetoPyrrole SC-CH2" | 6  | 12.011 | 4 |  |  |  |
| charge | 913 |        | -0.21                  |    |        |   |  |  |  |
| charge | 914 |        | 0.50                   |    |        |   |  |  |  |
| charge | 915 |        | 0.12                   |    |        |   |  |  |  |
| charge | 916 |        | -0.25                  |    |        |   |  |  |  |
| charge | 917 |        | -0.50                  |    |        |   |  |  |  |
| charge | 918 |        | 0.10                   |    |        |   |  |  |  |
| vdw    | 913 | 3.2500 | 0.1700                 |    |        |   |  |  |  |
| vdw    | 914 | 3.5500 | 0.0700                 |    |        |   |  |  |  |
| vdw    | 915 | 3.5500 | 0.0700                 |    |        |   |  |  |  |
| vdw    | 916 | 3.5500 | 0.0700                 |    |        |   |  |  |  |

|        |         |                                   |        |
|--------|---------|-----------------------------------|--------|
| vdw    | 917     | 2.9600                            | 0.2100 |
| vdw    | 918     | 3.5500                            | 0.0700 |
| atom   | 919     | 101 S "Thiophene2 S" 16 32.060 2  |        |
| atom   | 920     | 102 Cd "Thiophene2 C2" 6 12.011 3 |        |
| atom   | 921     | 103 CS "Thiophene2 C3" 6 12.011 3 |        |
| atom   | 922     | 104 CS "Thiophene2 C4" 6 12.011 3 |        |
| atom   | 923     | 105 Cd "Thiophene2 C5" 6 12.011 3 |        |
| atom   | 924     | 106 HA "Thiophene2 H1" 1 1.008 1  |        |
| charge | 919     | -0.10                             |        |
| charge | 920     | 0.12                              |        |
| charge | 921     | -0.26                             |        |
| charge | 922     | -0.15                             |        |
| charge | 923     | 0.13                              |        |
| charge | 924     | 0.16                              |        |
| vdw    | 919     | 3.5500                            | 0.2500 |
| vdw    | 920     | 3.5500                            | 0.0700 |
| vdw    | 921     | 3.5500                            | 0.0700 |
| vdw    | 922     | 3.5500                            | 0.0700 |
| vdw    | 923     | 3.5500                            | 0.0700 |
| vdw    | 924     | 2.4200                            | 0.0300 |
| atom   | 925     | 112 S "BDT S" 16 32.060 2         |        |
| atom   | 926     | 113 C "BDT C1" 6 12.011 3         |        |
| atom   | 927     | 114 C "BDT C2" 6 12.011 3         |        |
| atom   | 928     | 115 C "BDT C3" 6 12.011 3         |        |
| atom   | 929     | 116 C "BDT C4" 6 12.011 3         |        |
| atom   | 930     | 117 C "BDT C5" 6 12.011 3         |        |
| atom   | 931     | 118 C "BDT SC C6" 6 12.011 4      |        |
| atom   | 932     | 119 HA "BDT H1" 1 1.008 1         |        |
| charge | 925     | -0.03                             |        |
| charge | 926     | -0.10                             |        |
| charge | 927     | -0.120001                         |        |
| charge | 928     | 0.000001                          |        |
| charge | 929     | 0.05                              |        |
| charge | 930     | -0.10                             |        |
| charge | 931     | 0.10                              |        |
| charge | 932     | 0.19                              |        |
| vdw    | 925     | 3.5500                            | 0.2500 |
| vdw    | 926     | 3.5500                            | 0.0700 |
| vdw    | 927     | 3.5500                            | 0.0700 |
| vdw    | 928     | 3.5500                            | 0.0700 |
| vdw    | 929     | 3.5500                            | 0.0700 |
| vdw    | 930     | 3.5500                            | 0.0700 |
| vdw    | 931     | 3.5500                            | 0.0700 |
| vdw    | 932     | 2.4200                            | 0.0300 |
| #thio1 |         |                                   |        |
| bond   | 101 102 | 250.00                            | 1.727  |

|       |     |     |        |       |       |
|-------|-----|-----|--------|-------|-------|
| bond  | 102 | 103 | 546.00 | 1.371 |       |
| bond  | 103 | 104 | 546.00 | 1.416 |       |
| bond  | 104 | 105 | 546.00 | 1.389 |       |
| bond  | 105 | 101 | 250.00 | 1.764 |       |
| bond  | 102 | 106 | 367.00 | 1.08  |       |
| bond  | 103 | 106 | 367.00 | 1.08  |       |
| bond  | 104 | 106 | 367.00 | 1.08  |       |
| bond  | 109 | 102 | 546.00 | 1.440 |       |
| angle | 102 | 101 | 105    | 74.00 | 91.8  |
| angle | 101 | 102 | 103    | 70.00 | 111.9 |
| angle | 101 | 102 | 106    | 35.00 | 119.6 |
| angle | 103 | 102 | 106    | 35.00 | 128.5 |
| angle | 102 | 103 | 104    | 70.00 | 113.1 |
| angle | 102 | 103 | 106    | 35.00 | 123.4 |
| angle | 104 | 103 | 106    | 35.00 | 123.6 |
| angle | 103 | 104 | 105    | 70.00 | 113.5 |
| angle | 103 | 104 | 106    | 35.00 | 124.6 |
| angle | 105 | 104 | 106    | 35.00 | 121.9 |
| angle | 101 | 105 | 104    | 70.00 | 109.7 |
| #DPP  |     |     |        |       |       |
| bond  | 105 | 109 | 546.00 | 1.442 |       |
| bond  | 107 | 108 | 427.00 | 1.434 |       |
| bond  | 107 | 109 | 427.00 | 1.395 |       |
| bond  | 108 | 110 | 546.00 | 1.445 |       |
| bond  | 109 | 110 | 546.00 | 1.398 |       |
| bond  | 110 | 110 | 546.00 | 1.420 |       |
| bond  | 108 | 111 | 570.00 | 1.230 |       |
| bond  | 107 | 13  | 337.00 | 1.461 |       |
| angle | 101 | 105 | 109    | 70.00 | 105.9 |
| angle | 104 | 105 | 109    | 70.00 | 124.4 |
| angle | 108 | 107 | 109    | 64.00 | 111.5 |
| angle | 108 | 107 | 13     | 70.00 | 118.4 |
| angle | 109 | 107 | 13     | 70.00 | 130.1 |
| angle | 107 | 108 | 110    | 70.00 | 104.2 |
| angle | 107 | 108 | 111    | 80.00 | 122.2 |
| angle | 110 | 108 | 111    | 80.00 | 133.6 |
| angle | 107 | 109 | 102    | 70.00 | 127.1 |
| angle | 107 | 109 | 110    | 70.00 | 106.6 |
| angle | 110 | 109 | 102    | 70.00 | 126.3 |
| angle | 105 | 109 | 107    | 70.00 | 127.0 |
| angle | 105 | 109 | 110    | 70.00 | 126.3 |
| angle | 108 | 110 | 109    | 70.00 | 142.3 |
| angle | 108 | 110 | 110    | 70.00 | 108.2 |
| angle | 109 | 110 | 110    | 70.00 | 109.5 |
| angle | 107 | 13  | 13     | 58.35 | 113.0 |
| angle | 107 | 13  | 36     | 35.00 | 107.0 |

```

angle    109    102 101 70.00 125.9
angle    109    102 103 70.00 125.8
#BDT
bond     105    113 546.00 1.441
bond     112    113 250.00 1.771
bond     113    114 546.00 1.373
bond     114    115 546.00 1.432
bond     115    116 546.00 1.414
bond     116    112 250.00 1.751
bond     116    116 546.00 1.393
bond     115    117 546.00 1.432
bond     117    118 469.00 1.518
bond     117    117 546.00 1.395
bond     114    119 367.00 1.080
bond     118     13 367.00 1.080
bond     118     36 268.00 1.529
angle    101    105 113 70.00 120.9
angle    104    105 113 70.00 128.8
angle    113    112 116 74.00 90.9
angle    105    113 112 70.00 119.9
angle    105    113 114 70.00 128.7
angle    112    113 114 70.00 111.3
angle    113    114 115 70.00 114.5
angle    113    114 119 35.00 125.9
angle    115    114 119 35.00 123.6
angle    114    115 116 70.00 111.0
angle    114    115 117 70.00 128.0
angle    116    115 117 70.00 121.0
angle    112    116 115 70.00 112.3
angle    112    116 116 70.00 128.3
angle    115    116 116 70.00 119.7
angle    115    117 117 70.00 119.2
angle    115    117 118 70.00 117.6
angle    117    117 118 70.00 123.2
angle    117    118 36 35.00 107.0
angle     13    118 36 35.00 107.0
angle    118 13 13 58.35 113.0
angle    118     13 36 35.00 107.0
angle    117    117 13 70.00 123.2
angle     36    118 36 33.00 107.8
angle    117 118 13 58.35 112.7
#torsion
torsion   0 103 104 0 0.000 0.0 1 7.250 180.0 2 0.000 0.0 3 0.000 180.0 4
torsion   0 102 103 0 0.000 0.0 1 7.250 180.0 2 0.000 0.0 3 0.000 180.0 4
torsion   0 101 102 0 0.000 0.0 1 7.250 180.0 2 0.000 0.0 3 0.000 180.0 4
torsion   0 101 105 0 0.000 0.0 1 7.250 180.0 2 0.000 0.0 3 0.000 180.0 4

```



```

torsion    0 104 105  0   0.000 0.0 1 7.250 180.0 2 0.000 0.0 3 0.000 180.0 4
torsion    0 101 102  0   0.000 0.0 1 7.250 180.0 2 0.000 0.0 3 0.000 180.0 4
#DIHEDRAL THIO 1
torsion    101   105 109 107   0.000 0.0 1 0.000 180.0 2 0.000 0.0 3 0.000   180.0 4
torsion    104   105 109 107   0.000 0.0 1 0.000 180.0 2 0.000 0.0 3 0.000   180.0 4
#torsion   104   105 109 110   -2.017 0.0 1 8.394 180.0 2 -1.725 0.0 3 0.151   180.0 4
torsion   104 105 109 110 -1.906 0.0 1 8.514 180.0 2 -1.613 0.0 3 0.271 180.0 4
torsion    101   105 109 110   0.000 0.0 1 0.000 180.0 2 0.000 0.0 3 0.000   180.0 4
#
torsion    0   107 108  0   0.000 0.0 1 7.250 180.0 2 0.000 0.0 3 0.000   180.0 4
torsion    0 107 109  0   0.000 0.0 1 7.250 180.0 2 0.000 0.0 3 0.000   180.0 4
torsion    0   107 13 13   1.000 0.0 1 -0.350 180.0 2 0.000 0.0 3 0.000   180.0 4
torsion    0 13 13 107   0.000 0.0 1 0.000 180.0 2 0.462 0.0 3 0.000   180.0 4
torsion    0   107 13 36   0.000 0.0 1 0.000 180.0 2 0.000 0.0 3 0.000   180.0 4
torsion    0   108 110  0   0.000 0.0 1 10.750 180.0 2 0.000 0.0 3
torsion    0   110 110  0   0.000 0.0 1 10.750 180.0 2 0.000 0.0 3
torsion    0   109 110  0   0.000 0.0 1 10.750 180.0 2 0.000 0.0 3
#DIHEDRAL THIO 2
torsion    107   109 102 101 0.000 0.0 1 0.000 180.0 2 0.000 0.0 3
torsion    107   109 102 103 0.000 0.0 1 0.000 180.0 2 0.000 0.0 3
torsion    110   109 102 101 0.000 0.0 1 0.000 180.0 2 0.000 0.0 3
torsion    110   109 102 103 -2.100 0.0 1 8.536 180.0 2 -1.840 0.0 3 -0.009 180.0 4
#
#DIHEDRAL 3 THIO-BDT
torsion    101   105 113 112   0.000 0.0 1 0.000 180.0 2 0.000 0.0 3
torsion    101   105 113 114   0.133 0.0 1 2.754 180.0 2 -0.195 0.0 3 -1.011 180.0 4
torsion    104   105 113 112   0.000 0.0 1 0.000 180.0 2 0.000 0.0 3
torsion    104   105 113 114   0.000 0.0 1 0.000 180.0 2 0.000 0.0 3
#
torsion    0 112 113  0 0.000 0.0 1 7.250 180.0 2 0.000 0.0 3
torsion    0   112 116  0   0.000 0.0 1 7.250 180.0 2 0.000 0.0 3
torsion    0   113 114  0   0.000 0.0 1 7.250 180.0 2 0.000 0.0 3
torsion    0   114 115  0   0.000 0.0 1 7.250 180.0 2 0.000 0.0 3
torsion    0   115 116  0   0.000 0.0 1 7.250 180.0 2 0.000 0.0 3
torsion    0   115 117  0   0.000 0.0 1 7.250 180.0 2 0.000 0.0 3
torsion    0   116 116  0   0.000 0.0 1 7.250 180.0 2 0.000 0.0 3
torsion    0   117 117  0   0.000 0.0 1 7.250 180.0 2 0.000 0.0 3
torsion    0   117 118 13   0.000 0.0 1 0.000 180.0 2 0.000 0.0 3
torsion    0   117 118 36   0.000 0.0 1 0.000 180.0 2 0.000 0.0 3
torsion    0   118 13 13   1.000 0.0 1 -0.350 180.0 2 0.000 0.0 3
torsion    118   13 13 13   1.300 0.0 1 -0.050 180.0 2 0.000 0.0 3
torsion    118   13 13 36   0.000 0.0 1 0.000 180.0 2 0.300 0.0 3
torsion    36   118 13 36   0.000 0.0 1 0.000 180.0 2 0.300 0.0 3
torsion    117   118 13 36   0.000 0.0 1 0.000 180.0 2 0.000 0.0 3
#these parameters are just for refitting purposes
bond 109 106 367.0 1.08

```

```

bond 116 13 545.0 1.51
bond 113 106 367.0 1.08
bond 117 13 545.0 1.51
angle 110 109 106 35.00 130.4
angle 106 109 107 35.00 120.9
angle 115 117 13 70.00 120.5
angle 114 113 106 35.00 127.7
angle 106 113 112 70.00 119.3
angle 117 13 36 35.00 112.5
torsion 115 117 13 36 0.000 0.0 1 0.000 180.0 2 0.000 0.0 3
torsion 117 117 13 36 0.000 0.0 1 0.000 180.0 2 0.000 0.0 3
imptors 0 0 110 0 0.000 0.0 1 5.000 180.0 2 0.000 0.0 3

```

## Example Input File for Disordered PDI

### Control file

```

# ----- Init Section -----
include "box_of_PDI_label_min.in.init"

# ----- Atom Definition Section -----
read_data "box_of_PDI_label_min.data"

# ----- Setting Section -----
include "box_of_PDI_label_min.in.settings"

# ----- Run Section -----

#USING RATTLE TO GET TIMESTEP OF 2
thermo 1000
thermo_style custom step dt temp press vol etotal ke pe ebond eangle edihed eimp evdwl ecolong density
neigh_modify delay 0 every 1 check yes page 1000000 one 100000
run_style verlet

#QUICK COMPRESS TO CLEAN UP THE SIMULATION BOX
dump 1 all atom 1000 min.dump
fix 1 all box/relax iso 10000000.0 vmax 0.01
minimize 1.0e-6 1.0e-6 20000 200000
unfix 1
undump 1

#NVE EQUILIBRATION RUN (20 ps)
timestep 1
fix 2 all nve/limit 0.01
run 20000
unfix 2

#Second Compression Minimization
fix 3 all box/relax iso 10000000.0 vmax 0.01
minimize 1.0e-6 1.0e-6 20000 200000
unfix 3

#Second NVE Equil
timestep 1
fix 4 all nve/limit 0.01
run 20000
unfix 4

```

```

#Heating up
timestep 2
neigh_modify delay 5 every 1 check yes page 1000000 one 100000
fix 5 all npt temp 10.0 550.0 100.0 iso 1.0 1.0 1000
fix 15 all rattle 0.0001 20 0 m 1.008
run 50000
unfix 15
unfix 5

```

```

#ANNEALING RUN (550K for 2 ns)
fix 6 all npt temp 550.0 550.0 100.0 iso 1.0 1.0 1000
fix 16 all rattle 0.0001 20 0 m 1.008
run 5000000
unfix 16
unfix 6

```

```

#COOLING (550K - 298K over 100 ps)
fix 7 all npt temp 550.0 298.0 100 iso 1.0 1.0 1000
fix 17 all rattle 0.0001 20 0 m 1.008
run 5000000
unfix 17
unfix 7

```

```

#SIMULATION (nPT for 6 ns; 1 ns snapshots)
dump 8 all atom 1000000 equil.dump
fix 8 all npt temp 298.0 298.0 100 iso 1.0 1.0 1000
fix 18 all rattle 0.0001 20 0 m 1.008
run 5000000
unfix 18
unfix 8
undump 8

```

```

#NVT Run (nVT for 2 ns)
fix 200 all nvt temp 298.0 298.0 100
fix 201 all rattle 0.0001 20 0 m 1.008
run 500000
unfix 201
unfix 200

```

```

#NVE Equil
timestep 1
fix 700 all nve
run 50000
unfix 700

```

```

#SAMPLING (NVE for 20 ps; 10 fs snapshots)
timestep 1
dump 100 all atom 10 sample.dump
fix 100 all nve
run 20000
unfix 100
undump 100

```

```

#END OF RUN SECTION #

```

## **.init file**

```

units      real      # angstroms,kCal/mol,Daltons,Kelvin
atom_style full      # select column format for Atoms section
pair_style lj/cut/coul/long 10.0 10.0 # cutoffLJ cutoff_coulomb
bond_style harmonic #parameters needed: k_bond, r0
angle_style harmonic #parameters needed: k_theta, theta0
dihedral_style opls
improper_style cvff
kspace_style pppm 0.0001 # long-range electrostatics sum method
pair_modify mix arithmetic #using Lorenz-Berthelot mixing rules

```

## Simulation Details

The data of Figure 3 was fit using the `Optimize.curve_fit` routine in Scipy. This routine employ a non-linear least squares to fit a function,  $f$ , to the data. The data was fit to the form:

$$\text{TCF}(t) = A1 \cdot \exp(-b1 \cdot t) + A2 \cdot \exp(-b2 \cdot t)$$

The optimal values of the fitting parameters were the following:

### **Disordered PDI**

A1, A2, b1, b2

```
[ 0.49960115  0.48670783  0.00526324  0.03193688]
```

and the covariance matrix was:

```
[[ 9.02869987e-05 -7.80417345e-05  6.92676478e-07  8.72171357e-06]
 [ -7.80417345e-05  9.45332078e-05 -6.16078009e-07 -5.73017840e-06]
 [ 6.92676478e-07 -6.16078009e-07  6.30505437e-09  6.06600711e-08]
 [ 8.72171357e-06 -5.73017840e-06  6.06600711e-08  1.19407013e-06]]
```

### **Disordered bBDT(TDPP)<sub>2</sub>**

A1, A2, b1, b2

```
[ 0.4235485  0.57582765  0.18934241  0.01063638]
```

and the covariance matrix was:

```
[[ 2.11630386e-04 -1.10262518e-04 -1.17334933e-04 -1.89822556e-06]
 [ -1.10262518e-04  1.11650354e-04  1.42336942e-04  1.91805797e-06]
 [ -1.17334933e-04  1.42336942e-04  4.19904609e-04  2.24795900e-06]
 [ -1.89822556e-06  1.91805797e-06  2.24795900e-06  4.80374715e-08]]
```

### **Crystalline bBDT(TDPP)<sub>2</sub>**

A1, A2, b1, b2

```
[ 0.80770858  0.14074453  0.01317332  0.00311807]
```

and the covariance matrix was:

```
[[ 3.77322746e-04 -3.76912356e-04 -6.12503629e-06 -5.15227374e-06]
 [ -3.76912356e-04  4.25922587e-04  7.81860648e-06  5.69374574e-06]
 [ -6.12503629e-06  7.81860648e-06  1.76896233e-07  9.63502632e-08]
 [ -5.15227374e-06  5.69374574e-06  9.63502632e-08  8.46924134e-08]]
```

### **Local TCF Fourier Transform**

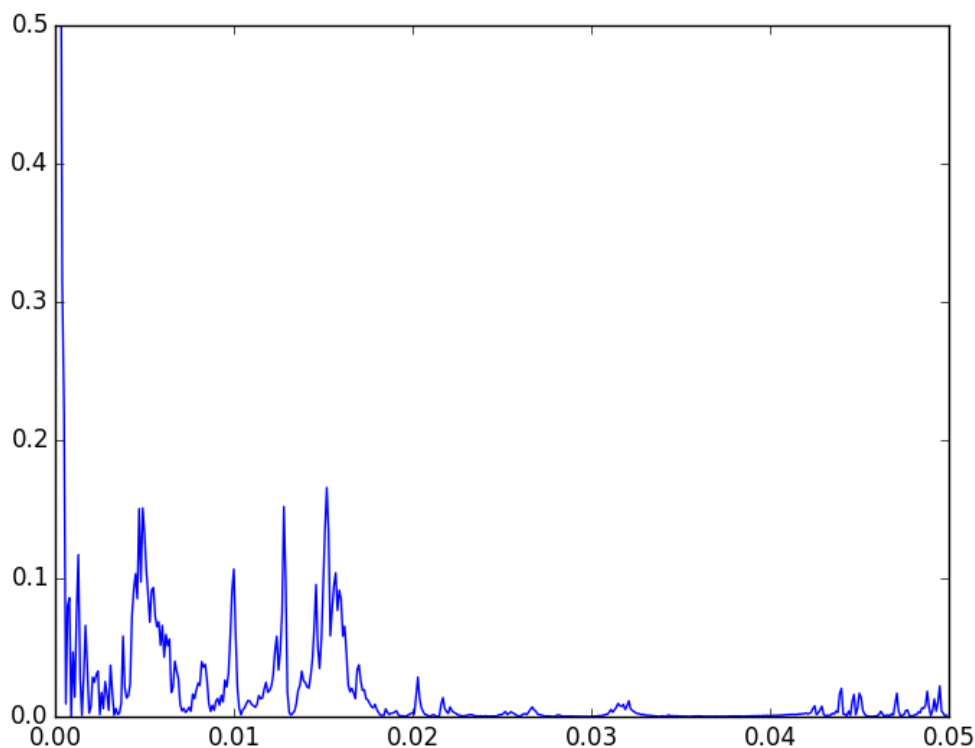

Figure S1 – Fourier spectrum of the ensemble averaged time-correlation function of the intermolecular electronic coupling between PDI LUMO's.

### **TCF of Matrix Spectral Norm**

To quantify how the self-similarity of the graph representing the charge transport network of the molecular aggregate evolves as a function of time, we compute a time-correlation function of the adjacency matrix spectral norm defined below. TCF reveals a decorrelation timescale of  $\sim 100$  fs, in agreement with the qualitative assignments derived from visual inspection of Figure 2 in the manuscript.

$$C_{ij}(\tau) = \lim_{T \rightarrow \infty} \int_0^T \frac{\text{SpecNorm}[A(t) - A(t + \tau)]}{T} dt$$

Where Norm represents the spectral norm, and A is the adjacency matrix at time t. The Spectral Norm TCF for all 5 trajectories are shown below.

PDI - Trajectory 1

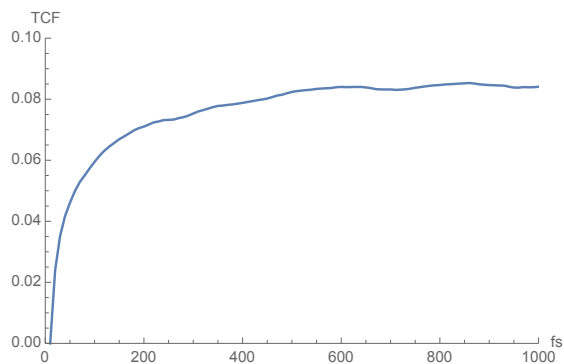

Figure S2 – TCF of the spectral norm of the adjacency matrix for PDI trajectory # 1.

PDI - Trajectory 2

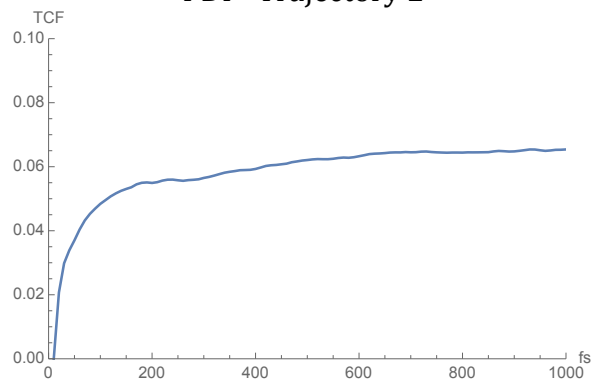

Figure S3 – TCF of the spectral norm of the adjacency matrix for PDI trajectory # 2.

### PDI - Trajectory 3

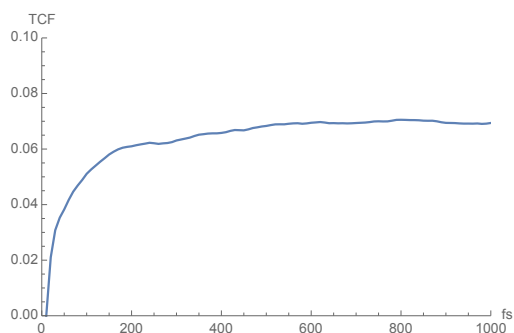

Figure S4 – TCF of the spectral norm of the adjacency matrix for PDI trajectory # 3.

### PDI - Trajectory 4

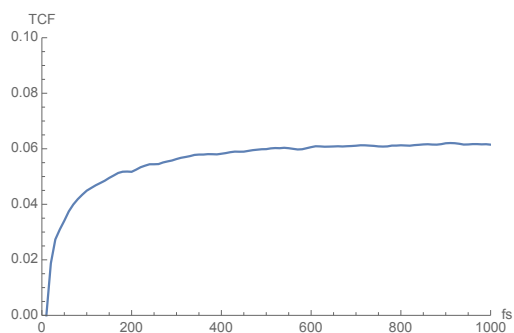

Figure S5 – TCF of the spectral norm of the adjacency matrix for PDI trajectory # 4.

### PDI - Trajectory 5

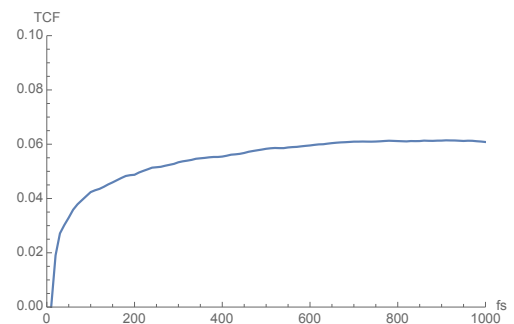

Figure S6 – TCF of the spectral norm of the adjacency matrix for PDI trajectory # 5.

## **Correlations between Kirchoff Index and Zero-Field Mobilities Using a Kinetic Monte Carlo Model**

While the correlation between the Kirchoff Index and experimental mobilities or diffusion constants has only been qualitative in previous work (Jackson – JPCL – 2015 – 1:1018-1021), here we use the same geometric model as in our previous work to generate example morphologies. Details on the description of the method for generating morphologies and the lattice model used can be found in our previous JPCL manuscript. These morphologies are then used to generate a realistic ensemble of charge transport networks defined by an adjacency matrix with elements corresponding to intermolecular couplings. These intermolecular couplings are used as inputs into Fermi's Golden Rule to derive rate constants of hopping between sites in the morphology. Fermi's Golden Rule is used for comparison to our Kirchoff Index using the Adjacency Matrix definition of the absolute value of the electronic coupling because both terms ignore energetic disorder, and infer rate constants only from the magnitude of the intermolecular electronic coupling. In a system in which energetic disorder were considered, one would use a Marcus-Jortner-Levich type expression, and a definition of the adjacency matrix which incorporates energetic disorder.

Using these rates, a master equation between all sites in the system is established, and approximately solved using a kinetic monte carlo (KMC) approach. Simulations are run for 10 ns, and the location of the charge on the lattice is computed at the beginning and end of the trajectory. A cubic lattice containing 3,375 sites is used. A maximum coupling of 0.025 eV is allowed between nearest neighbor sites in our model, and these values vary continuously depending on the relative orientations of nearest neighbor molecules (again, see previous JPCL work for more details on the model).

Finally, the mean-squared hopping distance  $(\Delta r)^2$  can be related to the zero-field mobility or a diffusion constant via an Einstein-like relation. Consequently, comparison of the Kirchoff index of our example networks to the KMC derived  $(\Delta r)^2$  allows for a rigorous test of the relationship between the Kirchoff index and charge mobilities/diffusion constants. The results of these simulations are shown in Figure S7, where a clearly positive, monotonic relationship between charge mobility and the kirchoff index is observed for the 250 independently sampled morphologies, providing proof of the utility of the Kirchoff index as a qualitative metric of charge mobilities.



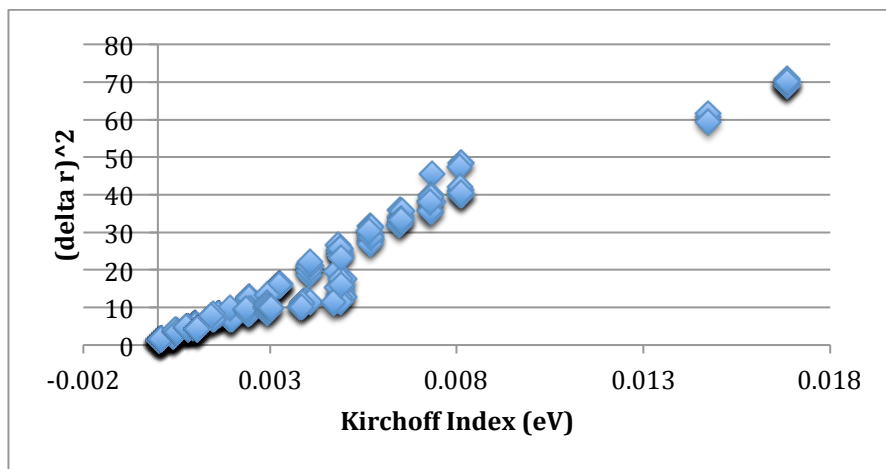

Figure S7 – Plot of KMC derived mean-squared displacement of charge vs network's Kirchoff Index. Units of  $\Delta r$  are in terms of lattice units.
